# Supplementary material
Source: HighWire-hosted journal article supplement (https://bmjopen.bmj.com/content/15/3/e091743)
Supplement: inline-supplementary-material-2 [file inline-supplementary-material-2.pdf]

|                 |                                                                                                                                                                                                                                                                                                                                                                                                                                                                                                                                                                                                                                                                                                                                                                                                                                                                                                                                                                                                                                                                                                                                                                                                                                                                  |    |
|-----------------|------------------------------------------------------------------------------------------------------------------------------------------------------------------------------------------------------------------------------------------------------------------------------------------------------------------------------------------------------------------------------------------------------------------------------------------------------------------------------------------------------------------------------------------------------------------------------------------------------------------------------------------------------------------------------------------------------------------------------------------------------------------------------------------------------------------------------------------------------------------------------------------------------------------------------------------------------------------------------------------------------------------------------------------------------------------------------------------------------------------------------------------------------------------------------------------------------------------------------------------------------------------|----|
|                 | OR 'fat'/exp OR 'fat' OR 'obese' OR 'overweight'/exp OR 'overweight') AND ('water aerobics'/exp OR 'water aerobics' OR 'waterobics' OR 'aquarobics' OR 'aquatic fitness' OR 'aquafitness' OR 'aquafit' OR 'aqua zumba' OR 'water yoga' OR 'aqua aerobics' OR 'aqua jog' OR (('water'/exp OR 'water') AND ('exercise'/exp OR 'exercise' OR 'aerobics'/exp OR 'aerobics' OR 'exercises' OR 'cycling'/exp OR 'cycling' OR 'physical activity'/exp OR 'physical activity' OR 'activities, physical' OR 'activity, physical'/exp OR 'activity, physical' OR 'physical activities' OR 'exercise, physical' OR 'exercises, physical' OR 'physical exercise'/exp OR 'physical exercise' OR 'physical exercises' OR 'acute exercise'/exp OR 'acute exercise' OR 'acute exercises' OR 'exercise, acute' OR 'exercises, acute' OR 'exercise, isometric'/exp OR 'exercise, isometric' OR 'exercises, isometric' OR 'isometric exercises' OR 'isometric exercise'/exp OR 'isometric exercise' OR 'exercise, aerobic'/exp OR 'exercise, aerobic' OR 'aerobic exercise'/exp OR 'aerobic exercise' OR 'aerobic exercises' OR 'exercises, aerobic' OR 'exercise training'/exp OR 'exercise training' OR 'exercise trainings' OR 'training, exercise' OR 'trainings, exercise')))) |    |
| Ovid<br>MEDLINE | 1 "Randomised controlled trial ".mp.<br>2 exp Randomized Controlled Trials as Topic/<br>3 " controlled trial".mp.<br>4 " randomized controlled study ".mp.<br>5 "Clinical Trials, Randomized".mp.<br>6 "Trials, Randomized Clinical".mp.<br>7 "Controlled Clinical Trials, Randomized".mp.<br>8 1 or 2 or 3 or 4 or 5 or 6 or 7<br>9 exp Obesity/<br>10 exp Fats/<br>11 "obese".mp.<br>12 exp Overweight/<br>13 9 or 10 or 11 or 12<br>14 "water aerobics ".mp.<br>15 "aquarobics ".mp.<br>16 "aquatic fitness ".mp.<br>17 "aquafitness ".mp.<br>18 "aquafit".mp.<br>19 " water yoga".mp.<br>20 "aqua aerobics".mp.<br>21 14 or 15 or 16 or 17 or 18 or 19 or 20<br>22 exp Water/<br>23 exp Exercise/<br>24 "aerobics ".mp.<br>25 "Exercises".mp.                                                                                                                                                                                                                                                                                                                                                                                                                                                                                                                | 19 |

|        |                                                                                                                                                                                                                                                                                                                                                                                                                                                                                                                                                                                                                                                                                                                                                                                                                                                                                                                                                                                                                      |     |
|--------|----------------------------------------------------------------------------------------------------------------------------------------------------------------------------------------------------------------------------------------------------------------------------------------------------------------------------------------------------------------------------------------------------------------------------------------------------------------------------------------------------------------------------------------------------------------------------------------------------------------------------------------------------------------------------------------------------------------------------------------------------------------------------------------------------------------------------------------------------------------------------------------------------------------------------------------------------------------------------------------------------------------------|-----|
|        | 26 "cycling".mp.<br>27 "Physical Activity".mp.<br>28 "Activities, Physical".mp.<br>29 "Activity, Physical".mp.<br>30 "Physical Activities".mp.<br>31 "Exercise, Physical".mp.<br>32 "Exercises, Physical".mp.<br>33 "Physical Exercise".mp.<br>34 "Physical Exercises".mp.<br>35 "Acute Exercise".mp.<br>36 "Acute Exercises".mp.<br>37 "Exercise, Acute".mp.<br>38 "Exercises, Acute".mp.<br>39 "Exercise, Isometric".mp.<br>40 "Exercises, Isometric".mp.<br>41 "Isometric Exercises".mp.<br>42 "Isometric Exercise".mp.<br>43 "Exercise, Aerobic".mp.<br>44 "Aerobic Exercise".mp.<br>45 "Aerobic Exercises".mp.<br>46 "Exercises, Aerobic".mp.<br>47 "Exercise Training".mp.<br>48 "Exercise Trainings".mp.<br>49 "Training, Exercise".mp.<br>50 "Trainings, Exercise".mp.<br>51 23 or 24 or 25 or 26 or 27 or 28 or 29 or 30 or 31 or 32 or 33 or 34<br>or 35 or 36 or 37 or 38 or 39 or 40 or 41 or 42 or 43 or 44 or 45 or 46 or<br>47 or 48 or 49 or 50<br>52 22 and 51<br>53 21 or 52<br>54 8 and 13 and 53 |     |
| Scopus | ( ( TITLE-ABS-KEY ( "randomised controlled trial " ) OR<br>TITLE-ABS-KEY ( "randomized controlled trials as topic " ) OR<br>TITLE-ABS-KEY ( " controlled trial" ) OR TITLE-ABS-KEY ( "<br>randomized controlled study " ) OR TITLE-ABS-KEY ( "clinical trials,<br>randomized" ) OR TITLE-ABS-KEY ( "trials, randomized clinical" ) OR<br>TITLE-ABS-KEY ( "controlled clinical trials, randomized" ) ) ) AND<br>( ( TITLE-ABS-KEY ( obesity ) OR TITLE-ABS-KEY ( fat ) OR<br>TITLE-ABS-KEY ( obese ) OR TITLE-ABS-KEY ( overweight ) ) )<br>AND ( ( ( TITLE-ABS-KEY ( water ) ) AND ( ( TITLE-ABS-KEY<br>( exercise ) OR TITLE-ABS-KEY ( exercises ) OR TITLE-ABS-KEY<br>( cycling ) OR TITLE-ABS-KEY ( "physical activity" ) OR<br>TITLE-ABS-KEY ( "activities, physical" ) OR TITLE-ABS-KEY                                                                                                                                                                                                                         | 468 |

|                      |                                                                                                                                                                                                                                                                                                                                                                                                                                                                                                                                                                                                                                                                                                                                                                                                                                                                                                                                                                                                                                                                                                                                                                                                                                                                                                                   |      |
|----------------------|-------------------------------------------------------------------------------------------------------------------------------------------------------------------------------------------------------------------------------------------------------------------------------------------------------------------------------------------------------------------------------------------------------------------------------------------------------------------------------------------------------------------------------------------------------------------------------------------------------------------------------------------------------------------------------------------------------------------------------------------------------------------------------------------------------------------------------------------------------------------------------------------------------------------------------------------------------------------------------------------------------------------------------------------------------------------------------------------------------------------------------------------------------------------------------------------------------------------------------------------------------------------------------------------------------------------|------|
|                      | ( "activity, physical" ) OR TITLE-ABS-KEY ( "physical activities" ) OR TITLE-ABS-KEY ( "exercise, physical" ) OR TITLE-ABS-KEY ( "exercises, physical" ) OR TITLE-ABS-KEY ( "physical exercise" ) OR TITLE-ABS-KEY ( "physical exercises" ) OR TITLE-ABS-KEY ( "acute exercise" ) OR TITLE-ABS-KEY ( "acute exercises" ) OR TITLE-ABS-KEY ( "exercise, acute" ) OR TITLE-ABS-KEY ( "exercises, acute" ) OR TITLE-ABS-KEY ( "exercise, isometric" ) OR TITLE-ABS-KEY ( "exercises, isometric" ) OR TITLE-ABS-KEY ( "isometric exercises" ) OR TITLE-ABS-KEY ( "isometric exercise" ) OR TITLE-ABS-KEY ( "exercise, aerobic" ) OR TITLE-ABS-KEY ( "aerobic exercise" ) OR TITLE-ABS-KEY ( "aerobic exercises" ) OR TITLE-ABS-KEY ( "exercises, aerobic" ) OR TITLE-ABS-KEY ( "exercise training" ) OR TITLE-ABS-KEY ( "exercise trainings" ) OR TITLE-ABS-KEY ( "training, exercise" ) OR TITLE-ABS-KEY ( "trainings, exercise" ) ) ) OR ( ( TITLE-ABS-KEY ( "water aerobics " ) OR TITLE-ABS-KEY ( "waterobics " ) OR TITLE-ABS-KEY ( "aquarobics " ) OR TITLE-ABS-KEY ( "aquatic fitness " ) OR TITLE-ABS-KEY ( "aquafitness " ) OR TITLE-ABS-KEY ( "aquafit" ) OR TITLE-ABS-KEY ( " aqua zumba" ) OR TITLE-ABS-KEY ( " water yoga" ) OR TITLE-ABS-KEY ( "aqua aerobics" ) OR TITLE-ABS-KEY ( " aqua jog" ) ) ) ) |      |
| The Cochrane Library | #1 MeSH descriptor: [Randomized Controlled Trials as Topic] explode all trees<br>#2 MeSH descriptor: [Randomized Controlled Trial] explode all trees<br>#3 " controlled trial"<br>#4 " randomized controlled study "<br>#5 "Clinical Trials, Randomized"<br>#6 "Trials, Randomized Clinical"<br>#7 "Controlled Clinical Trials, Randomized"<br>#8 #1 OR #2 OR #3 OR #4 OR #5 OR #6 OR #7<br>#9 MeSH descriptor: [Obesity] explode all trees<br>#10 MeSH descriptor: [Fats] explode all trees<br>#11 obese<br>#12 MeSH descriptor: [Overweight] explode all trees<br>#13 #9 OR #10 OR #11 OR #12<br>#14 "water aerobics "<br>#15 waterobics<br>#16 aquarobics<br>#17 "aquatic fitness "<br>#18 aquafitness<br>#19 aquafit<br>#20 " aqua zumba"<br>#21 " water yoga"                                                                                                                                                                                                                                                                                                                                                                                                                                                                                                                                                | 1284 |

|                |                                                                                                                                                                                                                                                                                                                                                                                                                                                                                                                                                                                                                                                                                                                                                                                                                                                                                                                                                                                                                                                                                                                                                                                                                                                                                                                                                                                                                 |     |
|----------------|-----------------------------------------------------------------------------------------------------------------------------------------------------------------------------------------------------------------------------------------------------------------------------------------------------------------------------------------------------------------------------------------------------------------------------------------------------------------------------------------------------------------------------------------------------------------------------------------------------------------------------------------------------------------------------------------------------------------------------------------------------------------------------------------------------------------------------------------------------------------------------------------------------------------------------------------------------------------------------------------------------------------------------------------------------------------------------------------------------------------------------------------------------------------------------------------------------------------------------------------------------------------------------------------------------------------------------------------------------------------------------------------------------------------|-----|
|                | <div>#22 "aqua aerobics"</div> <div>#23 " aqua jog"</div> <div>#24 #14 OR #15 OR #16 OR #17 OR #18 OR #19 OR #20 OR #21 OR #22 OR #23</div> <div>#25 MeSH descriptor: [Water] explode all trees</div> <div>#26 MeSH descriptor: [Exercise] explode all trees</div> <div>#27 Exercises</div> <div>#28 cycling</div> <div>#29 "Physical Activity"</div> <div>#30 "Activity, Physical"</div> <div>#31 "Exercise, Physical"</div> <div>#32 "Exercises, Physical"</div> <div>#33 "Physical Exercise"</div> <div>#34 "Physical Exercises"</div> <div>#35 "Acute Exercise"</div> <div>#36 "Acute Exercises"</div> <div>#37 "Exercise, Acute"</div> <div>#38 "Exercises, Acute"</div> <div>#39 "Exercise, Isometric"</div> <div>#40 "Exercises, Isometric"</div> <div>#41 "Isometric Exercises"</div> <div>#42 "Isometric Exercise"</div> <div>#43 "Exercise, Aerobic"</div> <div>#44 "Aerobic Exercise"</div> <div>#45 "Aerobic Exercises"</div> <div>#46 "Exercises, Aerobic"</div> <div>#47 "Exercise Training"</div> <div>#48 "Exercise Trainings"</div> <div>#49 "Training, Exercise"</div> <div>#50 "Trainings, Exercise"</div> <div>#51 #26 OR #27 OR #28 OR #29 OR #30 OR #31 OR #32 OR #33 OR #34 OR #35 OR #36 OR #37 OR #38 OR #39 OR #40 OR #41 OR #42 OR #43 OR #44 OR #45 OR #46 OR #47 OR #48 OR #49 OR #50</div> <div>#52 #25 AND #51</div> <div>#53 #24 OR #52</div> <div>#54 #8 AND #13 AND #53</div> |     |
| Web of science | <div>((((((((((((((((((((((((((TS=(Exercise)) OR TS=(Exercises)) OR TS=(cycling)) OR TS=("Physical Activity")) OR TS=("Activities, Physical")) OR TS=("Activity, Physical")) OR TS=("Physical Activities")) OR TS=("Exercise, Physical")) OR TS=("Exercises, Physical")) OR TS=("Physical Exercise")) OR TS=("Physical Exercises")) OR TS=("Acute Exercise")) OR TS=("Acute Exercises")) OR TS=("Exercise, Acute")) OR TS=("Exercises, Acute")) OR</div>                                                                                                                                                                                                                                                                                                                                                                                                                                                                                                                                                                                                                                                                                                                                                                                                                                                                                                                                                        | 194 |

|  |                                                                                                                                                                                                                                                                                                                                                                                                                                                                                                                                                                                                                                                                                                                                                                                                                                                                                                                                                                                                                     |  |
|--|---------------------------------------------------------------------------------------------------------------------------------------------------------------------------------------------------------------------------------------------------------------------------------------------------------------------------------------------------------------------------------------------------------------------------------------------------------------------------------------------------------------------------------------------------------------------------------------------------------------------------------------------------------------------------------------------------------------------------------------------------------------------------------------------------------------------------------------------------------------------------------------------------------------------------------------------------------------------------------------------------------------------|--|
|  | <p>TS=("Exercise, Isometric")) OR TS=("Exercises, Isometric")) OR TS=("Isometric Exercises")) OR TS=("Isometric Exercise")) OR TS=("Exercise, Aerobic")) OR TS=("Aerobic Exercise")) OR TS=("Aerobic Exercises")) OR TS=("Exercises, Aerobic")) OR TS=("Exercise Training")) OR TS=("Exercise Trainings")) OR TS=("Training, Exercise")) OR TS=("Trainings, Exercise")) AND TS=(water)</p> <p>OR (((((((TS=("water aerobics ") OR TS=("waterobics ") OR TS=("aquarobics ") OR TS=("aquatic fitness ") OR TS=("aquafitness ") OR TS=("aquafit")) OR TS=(" aqua zumba")) OR TS=(" water yoga")) OR TS=("aqua aerobics")) OR TS=(" aqua jog") AND (((((TS=("Randomised controlled trial ") OR TS=("Randomized Controlled Trials as Topic")) OR TS=(" controlled trial")) OR TS=(" randomized controlled study ") OR TS=("Clinical Trials, Randomized")) OR TS=("Trials, Randomized Clinical")) OR TS=("Controlled Clinical Trials, Randomized")AND (((TS=(obesity)) OR TS=(fat)) OR TS=(obese)) OR TS=(Overweight)</p> |  |
|--|---------------------------------------------------------------------------------------------------------------------------------------------------------------------------------------------------------------------------------------------------------------------------------------------------------------------------------------------------------------------------------------------------------------------------------------------------------------------------------------------------------------------------------------------------------------------------------------------------------------------------------------------------------------------------------------------------------------------------------------------------------------------------------------------------------------------------------------------------------------------------------------------------------------------------------------------------------------------------------------------------------------------|--|
